# Supplementary material
Source: PubMed Central journal article supplement (PMC3477254)
Supplement: NIHMS405457-supplement-1_si_001.pdf [file NIHMS405457-supplement-1_si_001.pdf]

Supporting Information For:

## **A Small Molecule that Targets r(CGG)<sup>exp</sup> and Improves Defects in Fragile X-Associated Tremor Ataxia Syndrome**

Matthew D. Disney<sup>1,\*</sup>, Biao Liu<sup>1</sup>, Wang-Yong Yang<sup>1</sup>, Chantal Sellier<sup>3</sup>, Tuan Tran<sup>1,2</sup>,  
Nicolas Charlet-Berguerand<sup>3</sup>, and Jessica L. Childs-Disney<sup>1</sup>

<sup>1</sup>Department of Chemistry, The Kellogg School of Science and Engineering, The Scripps Research Institute, Scripps Florida, 130 Scripps Way 3A1, Jupiter, FL 33458 USA

<sup>2</sup>Department of Chemistry, University at Buffalo, Buffalo, NY 14620

<sup>3</sup>Institut de Génétique et de Biologie Moléculaire et Cellulaire (IGBMC), Institut National de la Santé et de la Recherche Médicale (INSERM) U964, Centre National de la Recherche Scientifique (CNRS) UMR7104, University of Strasbourg, Illkirch, France

\*author to whom correspondence should be addressed. Email: [Disney@scripps.edu](mailto:Disney@scripps.edu);  
Phone: 561-228-2203; Fax: 561-228-2147

### Contents:

- 1.) IC<sub>50</sub> Curve for displacement of DGCR8Δ from r(CGG)<sub>12</sub> by **1a** and derivatives thereof
- 2.) Affinity of DGCR8Δ for r(CGG) repeats
- 3.) Affinities of **1a** and derivatives thereof for an RNA containing one 5'CGG/3'GGC motif
- 4.) Table of RT-PCR Primers
- 5.) Representative RT-PCR Gels of the *PLEKHH2* and cTNT mini-genes and the corresponding plots of data
- 6.) Characterization of Compounds

1.) IC<sub>50</sub> Curve for displacement of DGCR8Δ from r(CGG)<sub>12</sub> by **1a** and **1b**

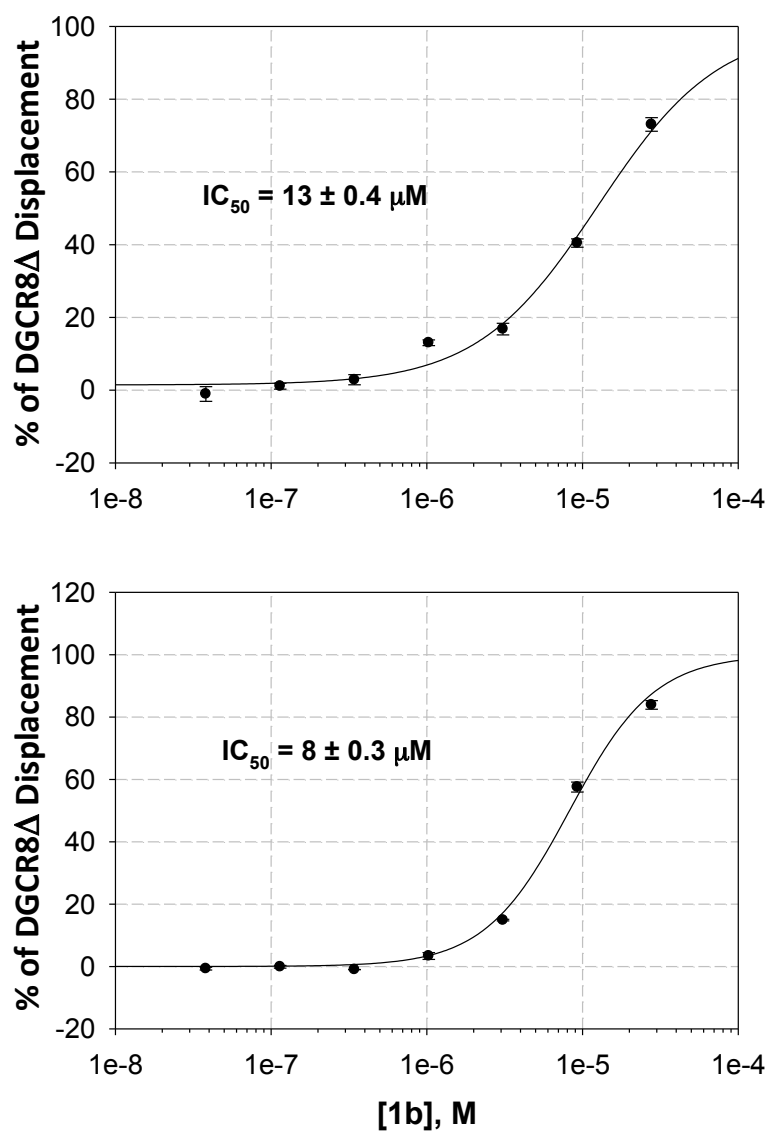

**Figure S-1:** Representative IC<sub>50</sub> curves for the displacement of DGCR8Δ from r(CGG)<sub>12</sub> by **1a** and **1b**. The IC<sub>50</sub>'s were determined by curve fitting to the following equation:

$$y = B + \frac{A-B}{1 + \left(\frac{IC_{50}}{x}\right)^{HillSlope}}$$

where y is the percentage of DGCR8Δ displaced, x is the concentration of ligand, B is the minimum percentage of protein displaced (typically 0), A is the maximum amount of protein displaced (typically 100), and the IC<sub>50</sub> is the concentration of ligand where half of the protein is displaced from the RNA.

## 2.) Affinity of DGCR8Δ for r(CGG) repeats

*Affinity of DGCR8Δ for Various RNAs Via Gel Mobility Shift Assays.* Prior to screening the RNA-focused library for inhibition of the r(CGG)<sub>12</sub>-DGCR8Δ complex, a gel mobility shift assay was used to determine the affinity of the protein for various RNAs. Briefly, the RNAs were radioactively labeled by *in vitro* transcription and [ $\alpha$ -<sup>32</sup>P] ATP as previously described (1). The RNAs were folded by incubating the samples at 60°C in 1X Gel Mobility Shift Buffer (50 mM Tris-HCl, pH 8.0, 75 mM NaCl, 37.5 mM KCl, 1 mM MgCl<sub>2</sub>, 5.25 mM DTT, and 0.1 mg/mL yeast tRNA) excluding the 1 mM MgCl<sub>2</sub> followed by slow cooling on the bench top. Then, MgCl<sub>2</sub> was added to a final concentration of 1 mM and increasing amounts of DGCR8Δ were added in a total volume of 10 μL. The samples were incubated at room temperature for 30 min, and then 2 μL of 6× Loading Buffer (40% glycerol, 0.125% Bromophenol Blue, and 0.125% Xylene Cyanol) was added. A 10 μL aliquot of the solution was loaded on a 8 % polyacrylamide (80:1 mono/bis) gel pre-chilled in ice water. The gel was run in 1× TBE for 30 min at 10 V/cm at 0 °C, and subsequently dried and exposed to a phosphorimager screen. The gel was imaged using a Typhoon phosphorimager. Protein-RNA binding curves were fit to the following equation:

$$y = \frac{x B_{\max}}{k_d + x} \quad (1)$$

where y is percentage of bounded DGCR8Δ, x is the concentration of protein, B<sub>max</sub> is maximum percentage of protein bound (restrained to equal 100%), and k<sub>d</sub> is dissociation constant, which is approximately equal to protein concentration where 50% of maximum binding is achieved.

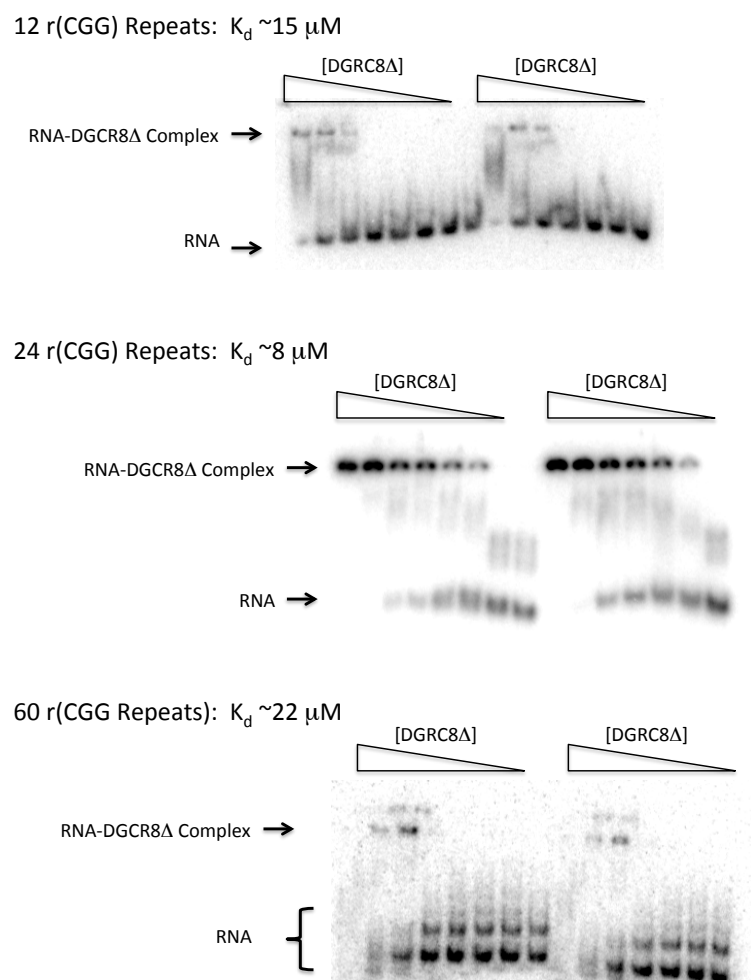

**Figure S-2:** DGRC8Δ binds to RNAs with different numbers of r(CGG) repeats similarly as determined by a gel mobility shift assay.

3.) Affinities of **1a** and **1b** for an RNA containing one 5'CGG/3'GGC motif

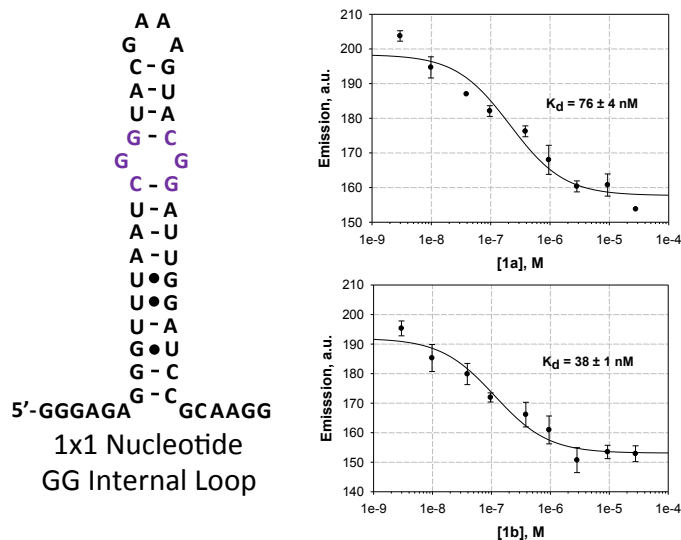

**Figure S-3:** Ligands **1a** - **1d** (curves for **1a** and **1b** shown) were studied for binding to an RNA with a 1x1 nucleotide GG internal loop via a competitive binding assay. Hoechst 33258 was used as the fluorescent indicator, as it has been previously shown to bind to a variety of RNA 1x1 nucleotide internal loops, including GG internal loops (2). The 1x1 nucleotide GG internal loop RNA (1  $\mu$ M) was complexed with an equimolar amount of Hoechst 33258 (1  $\mu$ M) and aliquots of a small molecule (**1a-1d**) were added and allowed to equilibrate for 5 min. Then, the reduction in fluorescence of Hoechst 33258 was measured using a Bio-Tek FLX-800 plate reader as a function of ligand concentration (**1a** – **1d**) and was fit to the following equation (3):

$$\theta = \frac{1}{2[Hit]_0} \left[ K_t + \frac{K_t}{K_d} [C_t]_0 + [RNA]_0 + [Hit]_0 - \sqrt{\left( K_t + \frac{K_t}{K_d} [C_t]_0 + [RNA]_0 + [Hit]_0 \right)^2 - 4[Hit]_0[RNA]_0} \right] + A \quad (eq. 4)$$

where  $\theta$  is the fraction bound of Hoechst 33258,  $K_t$  is the dissociation constant for Hoechst 33258,  $K_d$  is the dissociation constant of the competing ligand,  $[Hit]_0$  is the total concentration of the Hoechst 33258,  $[C_t]_0$  is the total concentration of the competing ligand,  $A$  is the fraction bound of Hoechst 33258 at infinite concentration of the competing ligand, and  $[RNA]_0$  is the total concentration of RNA.

#### 4.) Table of RT-PCR Primers

| <b>Table S-1:</b> Primer sets used for RT-PCR analysis of alternative splicing. |                                                     |                                              |
|---------------------------------------------------------------------------------|-----------------------------------------------------|----------------------------------------------|
| <b>Gene</b>                                                                     | <b>Forward Primer</b>                               | <b>Reverse Primer</b>                        |
| <i>SMN2</i> mini-gene                                                           | 5' GGT GTC CAC TCC CAG TTC<br>AA                    | 5' GCC TCA CCA CCG TGC TGG                   |
| <i>Bcl-x</i> mini-gene                                                          | 5' GGA GCT GGT GGT TGA CTT<br>TCT                   | 5' TAG AAG GCA CAG TCG<br>AGG                |
| cTNT mini-gene                                                                  | 5' GTT CAC AAC CAT CTA AAG<br>CAA GAT G             | 5' GTT GCA TGG CTG GTG CAG<br>G              |
| <i>PLEKHH2</i> mini-gene                                                        | 5' CGG GGT ACC AAA TGC TGC<br>AGT TGA CTC TCC       | 5' CCG CTC GAG CCA TTC ATG<br>AAG TGC ACA GG |
| <i>INSR</i> mini-gene                                                           | 5' GTA CAA GCT TGA ATG CTG<br>CTC CTG TCC AAG ACA G | 5' GCC CTC GAG CGT GGG CAC<br>GCT GGT C      |

5.) Representative RT-PCR Gels of the *PLEKHH2* and cTNT mini-genes and the corresponding plots of data

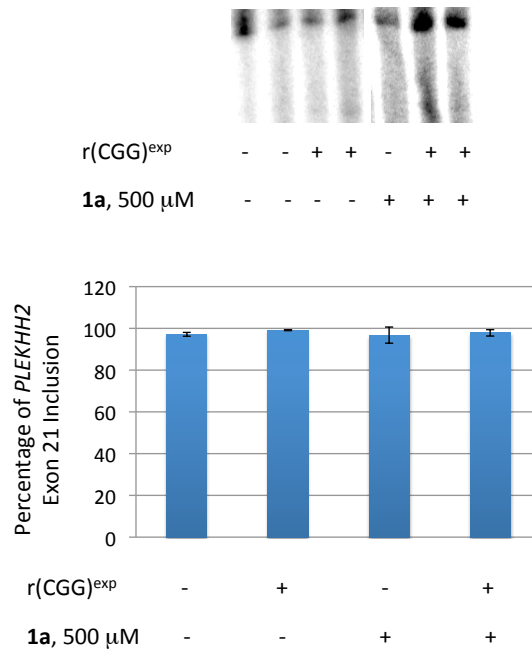

**Figure S-4:** **1a** does not affect the alternative splicing of a *PLEKHH2* mini-gene. Briefly, COS7 cells were co-transfected with (i) a plasmid containing no  $r(\text{CGG})$  repeats and the *PLEKHH2* mini-gene or (ii) a plasmid containing 60  $r(\text{CGG})$  repeats and a *PLEKHH2* minigene. Top, a representative gel autoradiogram. Bottom, plot of the corresponding data.

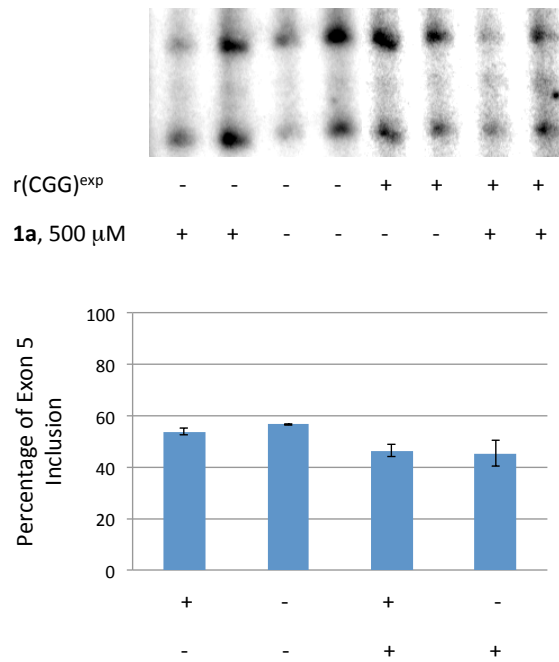

**Figure S-5:** **1a** does not affect the alternative splicing of a cTNT mini-gene. Briefly, COS7 cells were co-transfected with (i) a plasmid containing no r(CGG) repeats and the cTNT mini-gene or (ii) a plasmid containing 60 rCGG repeats and a cTNT minigene Top, a representative gel autoradiogram. Bottom, plot of the corresponding data.

## 6.) Characterization of Compounds

Mass spectra were collected on a Varian 500 MS spectrometer equipped with Varian Prostar Autosampler 410.

The purities of compounds were determined by analytical HPLC using a Waters 1525 Binary HPLC Pump equipped with Waters 2487 Dual  $\lambda$  Absorbance Detector system and the following conditions: a Waters Symmetry<sup>®</sup> C8 5 $\mu$ m 4.6 $\times$ 150 mm column, room temperature, a flow rate of 2.4 mL/min, and a linear gradient of 0% to 100% B in A for 60 min. A is water while B is methanol.

**Table S-2:** Characterization of 1a and derivatives thereof including HPLC retention times, and calculated and observed masses.

| Compound  | Molecular Formula                                             | HPLC Retention Time (min) | MS (Calculated)          | ESI(+)-MS (Found)        |
|-----------|---------------------------------------------------------------|---------------------------|--------------------------|--------------------------|
| <b>1a</b> | C <sub>24</sub> H <sub>28</sub> N <sub>3</sub> O <sup>+</sup> | 21                        | 374.2 (M)                |                          |
| <b>1b</b> | C <sub>23</sub> H <sub>28</sub> N <sub>3</sub> O <sup>+</sup> | 14                        | 362.2 (M)                | 362.3 (M)                |
| <b>1c</b> | C <sub>19</sub> H <sub>19</sub> N <sub>2</sub> O <sup>+</sup> | 18                        | 291.2 (M)                | 291.2 (M)                |
| <b>1d</b> | C <sub>18</sub> H <sub>17</sub> N <sub>2</sub> O <sup>+</sup> | 17                        | 277.1 (M)                | 277.1 (M)                |
| <b>1e</b> | C <sub>17</sub> H <sub>14</sub> N <sub>2</sub> O              | 29                        | 263.1 (M+H) <sup>+</sup> | 263.1 (M+H) <sup>+</sup> |
| <b>1f</b> | C <sub>17</sub> H <sub>14</sub> N <sub>2</sub>                | 32                        | 247.1 (M+H) <sup>+</sup> | 247.1 (M+H) <sup>+</sup> |

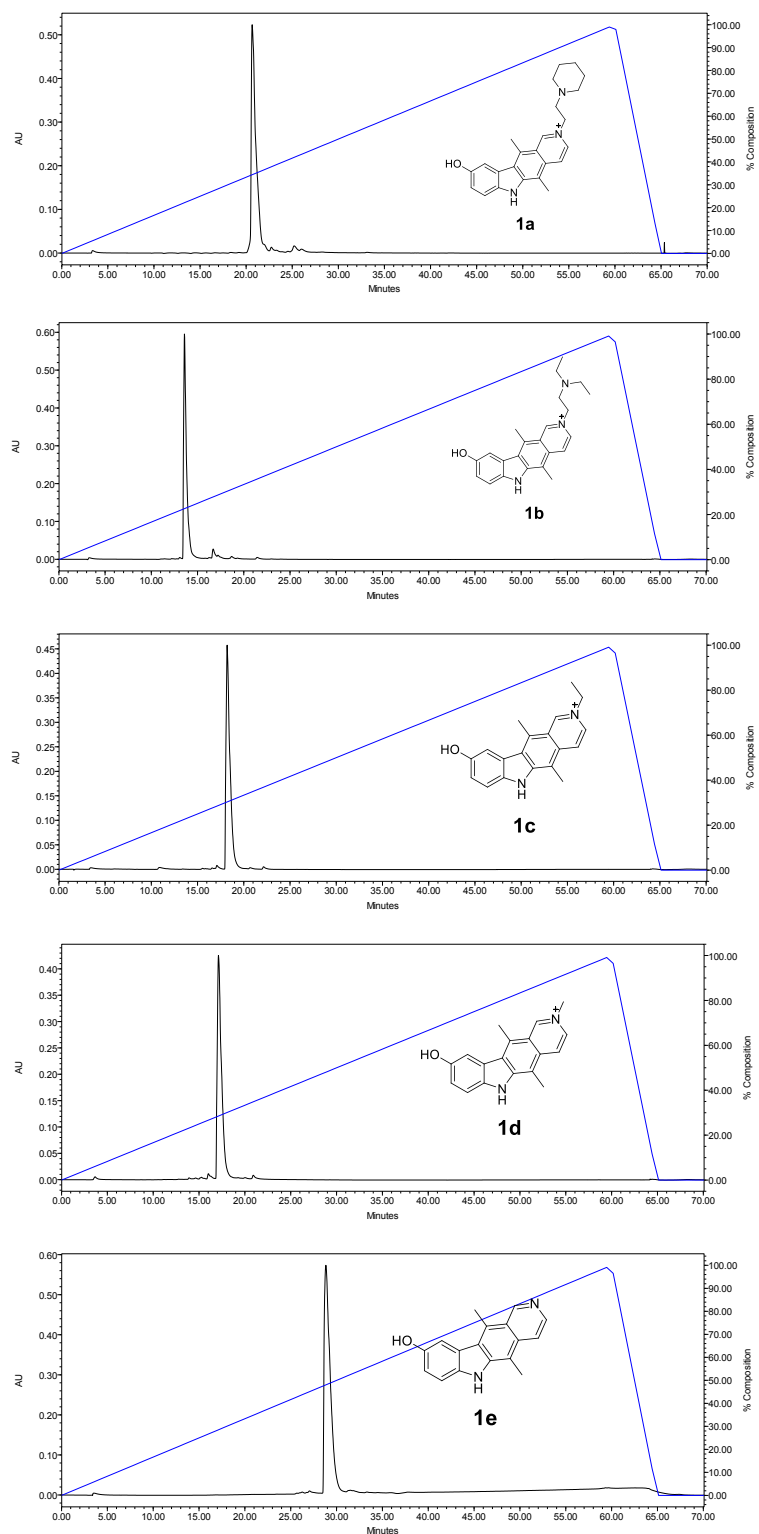

**Figure S-6:** HPLC chromatograms of compounds (blue: linear gradient of MeOH).

## REFERENCES

1. Tran, T., and Disney, M. D. (2010) Two-dimensional combinatorial screening of a bacterial rRNA A-site-like motif library: defining privileged asymmetric internal loops that bind aminoglycosides, *Biochemistry* 49, 1833-1842.
2. Cho, J., and Rando, R. R. (2000) Specific binding of Hoechst 33258 to site 1 thymidylate synthase mRNA, *Nucleic Acids Res* 28, 2158-2163.
3. Childs-Disney, J. L., Wu, M., Pushechnikov, A., Aminova, O., and Disney, M. D. (2007) A small molecule microarray platform to select RNA internal loop-ligand interactions, *ACS Chem Biol* 2, 745-754.
